# Supplementary material for: Components from the Leaves and Twigs of Mangrove Lumnitzera racemosa with Anti-Angiogenic and Anti-Inflammatory Effects
Source: Mar Drugs. 2018 Oct 25;16(11):404. doi: 10.3390/md16110404 (PMC6267291; doi:10.3390/md16110404)

## Supplementary data

# Components from the Leaves and Twigs of Mangrove *Lumnitzera racemosa* with Anti-Angiogenic and Anti-Inflammatory Effects

Szu-Yin Yu<sup>1†</sup>, Shin-Wei Wang<sup>1,2†</sup>, Tsong-Long Hwang<sup>3,4,5</sup>, Bai-Luh Wei<sup>6</sup>, Chien-Jung Su<sup>1</sup>, Fang-Rong Chang<sup>1,7,\*</sup>, and Yuan-Bin Cheng<sup>1,8,\*</sup>

- <sup>1</sup> Graduate Institute of Natural Products, College of Pharmacy, Kaohsiung Medical University, Kaohsiung 807, Taiwan; aaronfrc@kmu.edu.tw (F.-R. C.); s91412232@gmail.com (S.-Y. Y.); shihwei@mmc.edu.tw (S.-W. W.); jmb@kmu.edu.tw (Y.-B. C.)
  - <sup>2</sup> Department of Medicine, Mackay Medical College, New Taipei City 252, Taiwan; shihwei@mmc.edu.tw (S.-W. W.)
  - <sup>3</sup> Graduate Institute of Natural Products, College of Medicine, Chang Gung University, Kweishan 333, Taoyuan, Taiwan; htl@mail.cgu.edu.tw (T.-L. H.)
  - <sup>4</sup> Research Center for Industry of Human Ecology, Research Center for Chinese Herbal Medicine, and Graduate Institute of Health Industry Technology, College of Human Ecology, Chang Gung University of Science and Technology, Taoyuan 333, Taiwan
  - <sup>5</sup> Department of Anesthesiology, Chang Gung Memorial Hospital, Taoyuan 333, Taiwan
  - <sup>6</sup> Department of Life Science, National Taitung University, Taitung 950, Taiwan; blwei@nttu.edu.tw (B.-L. W.)
  - <sup>7</sup> National Research Institute of Chinese Medicine, Ministry of Health and Welfare, Taipei 112, Taiwan
  - <sup>8</sup> Department of Medical Research, Kaohsiung Medical University Hospital, Kaohsiung 807, Taiwan
- † These authors contributed equally to this work.

## Table of Contents

**Figure S1:** HRESIMS of racelactone A (**1**).

**Figure S2:** IR spectrum of racelactone A (**1**).

**Figure S3:** <sup>1</sup>H NMR Spectrum of racelactone A (**1**) in acetone-*d*<sub>6</sub>.

**Figure S4:** <sup>13</sup>C NMR Spectrum of racelactone A (**1**) in acetone-*d*<sub>6</sub>.

**Figure S5:** UV spectrum of racelactone A (**1**).

**Figure S6:** COSY Spectrum of racelactone A (**1**) in acetone-*d*<sub>6</sub>.

**Figure S7:** HMBC Spectrum of racelactone A (**1**) in acetone-*d*<sub>6</sub>.

Figure S1: HRESIMS of racelactone A (1).

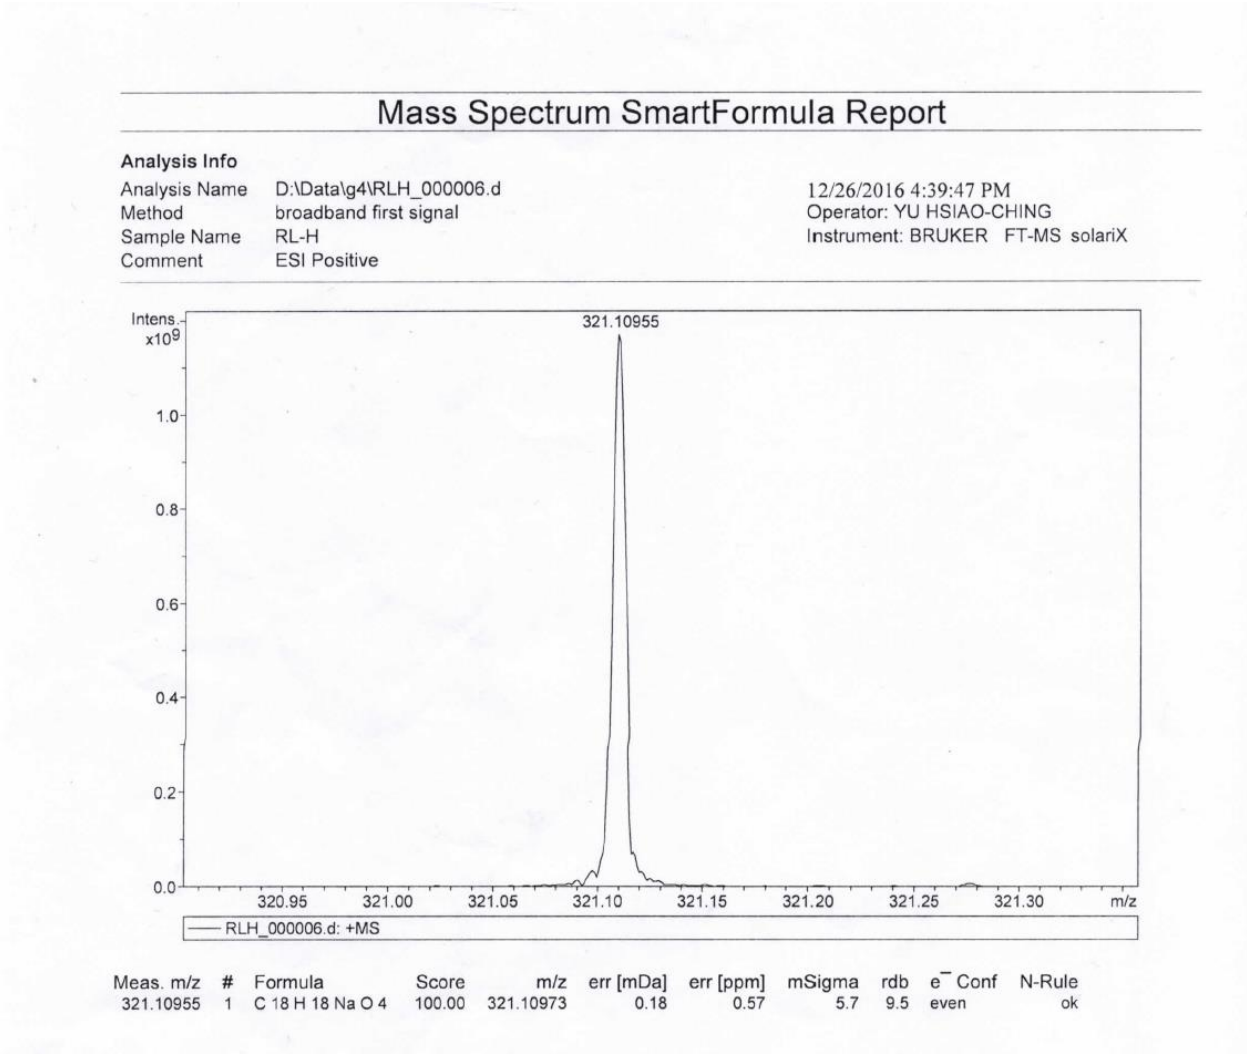

S2: IR spectrum of racelactone A (1).

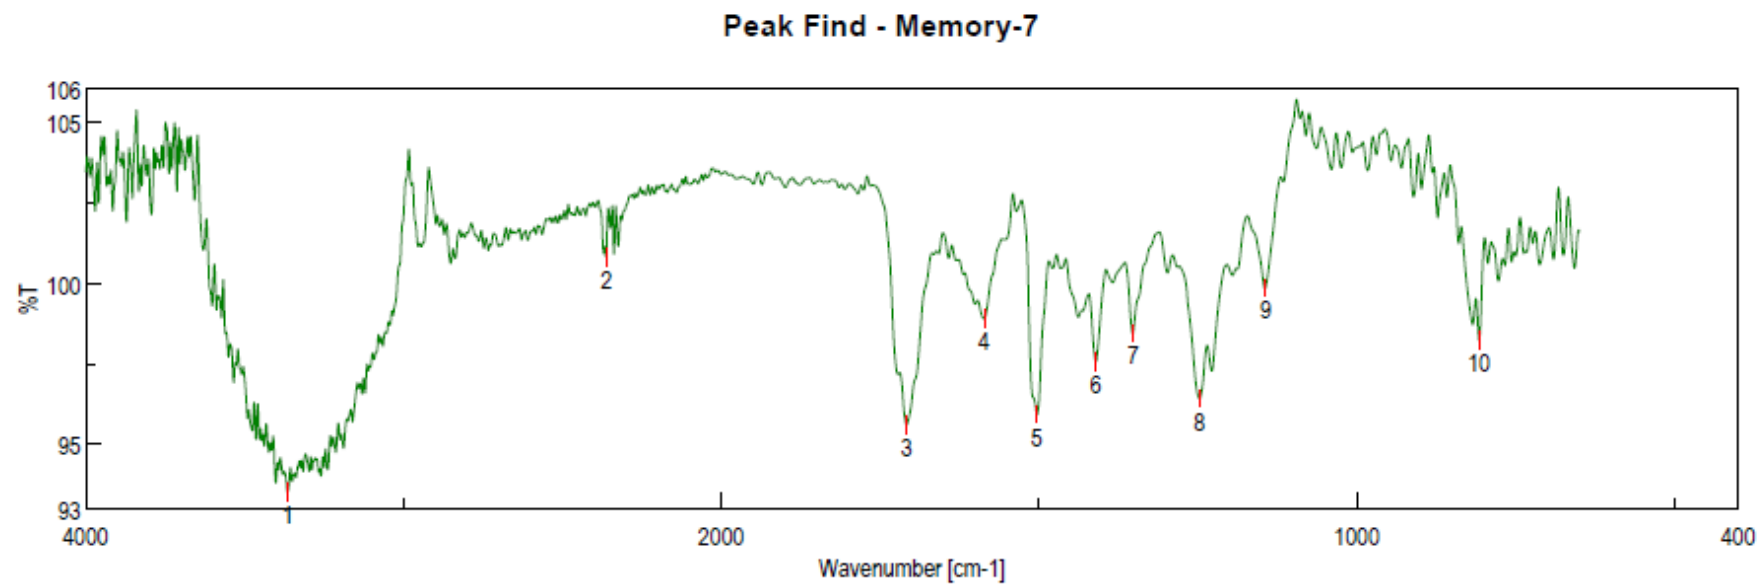

[ Result of Peak Picking ]

| No. | Position | Intensity | No. | Position | Intensity | No. | Position | Intensity |
|-----|----------|-----------|-----|----------|-----------|-----|----------|-----------|
| 1   | 3364.21  | 93.5209   | 2   | 2362.37  | 100.81    | 3   | 1708.62  | 95.605    |
| 4   | 1586.16  | 98.9065   | 5   | 1503.24  | 95.917    | 6   | 1410.67  | 97.5677   |
| 7   | 1351.86  | 98.4559   | 8   | 1247.72  | 96.4179   | 9   | 1143.58  | 99.8734   |
| 10  | 808.028  | 98.2354   |     |          |           |     |          |           |

**Figure S3:**  $^1\text{H}$  NMR Spectrum of racelactone A (**1**) in acetone- $d_6$ .

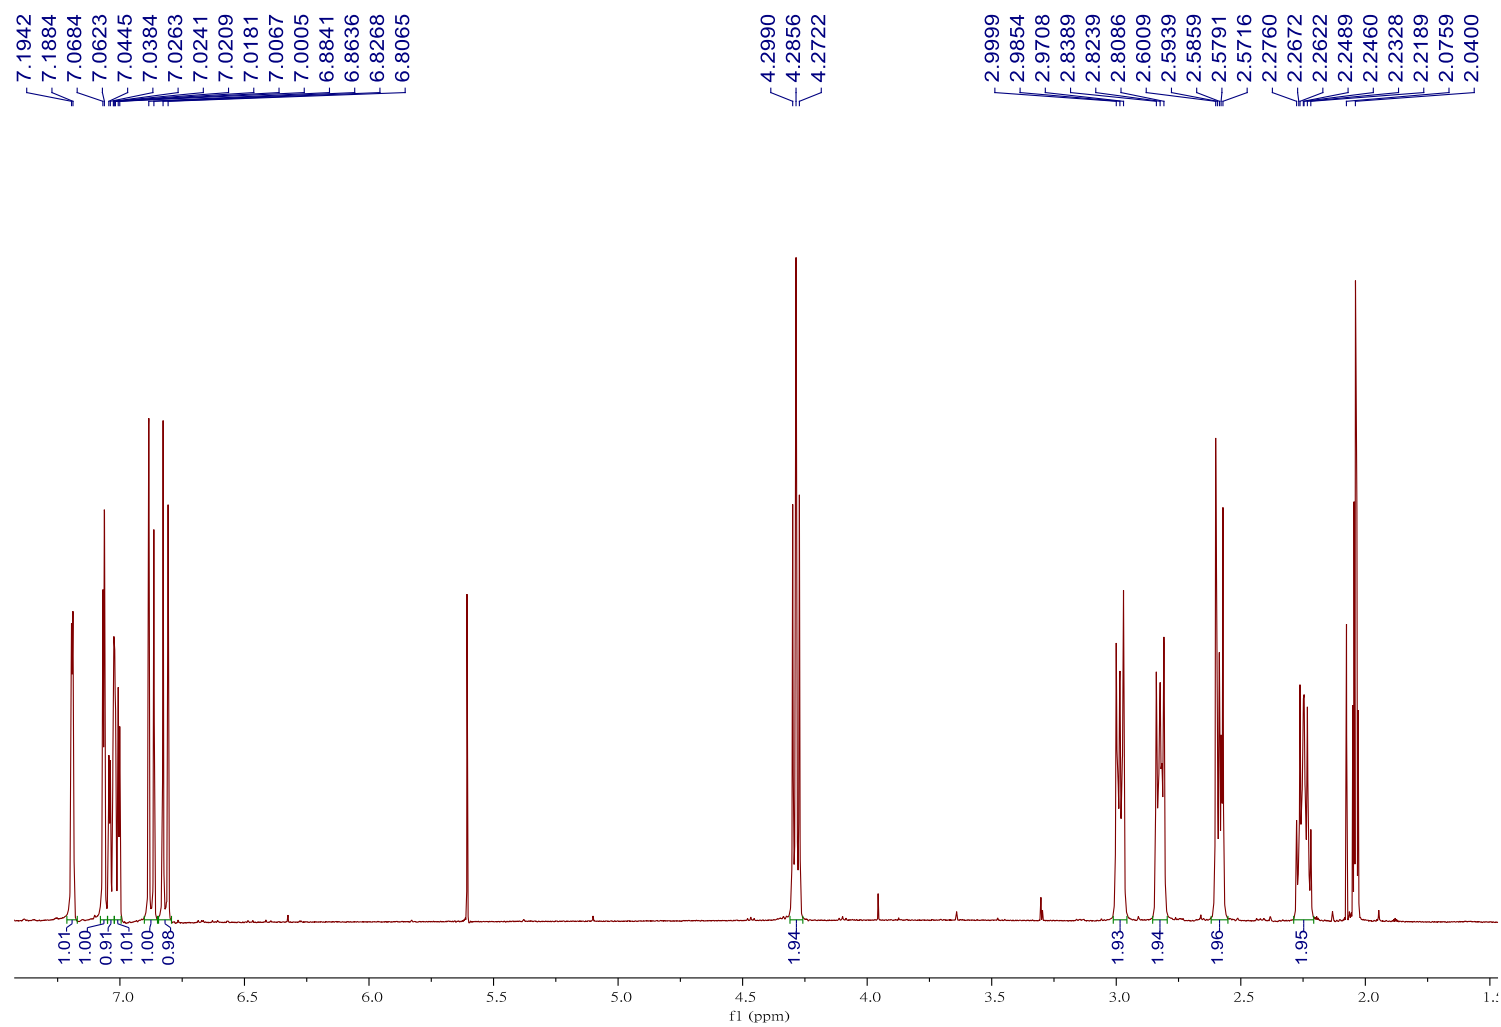

**Figure S4:**  $^{13}\text{C}$  NMR Spectrum of racelactone A (**1**) in acetone- $d_6$ .

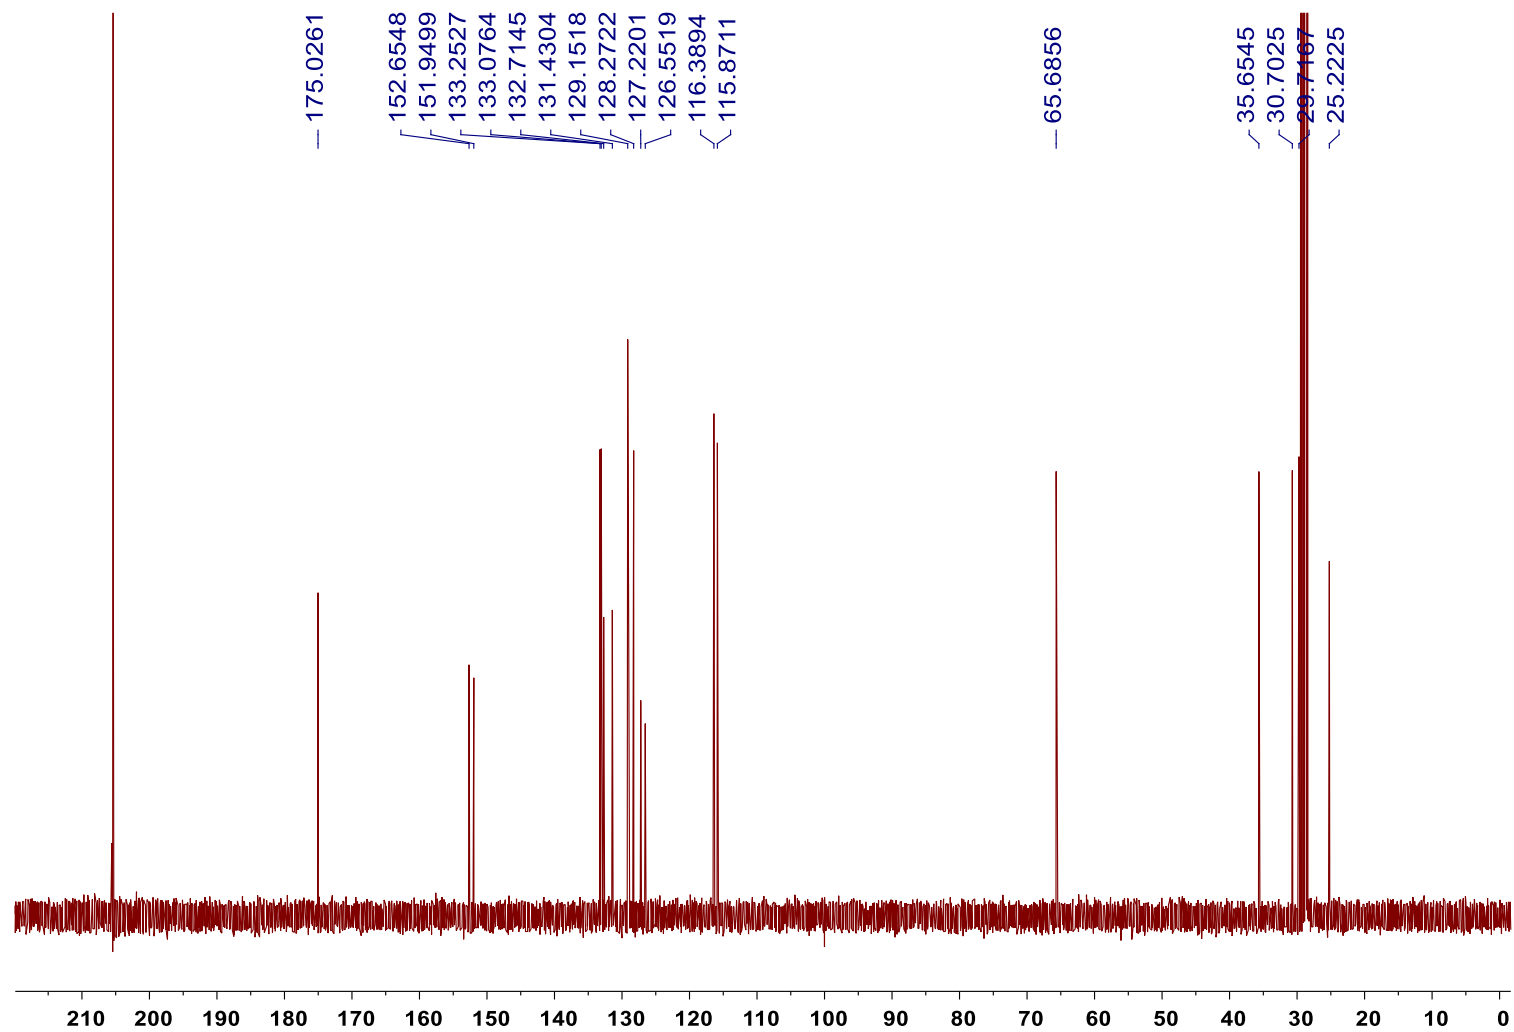

Figure S5: UV spectrum of racelactone A (1).

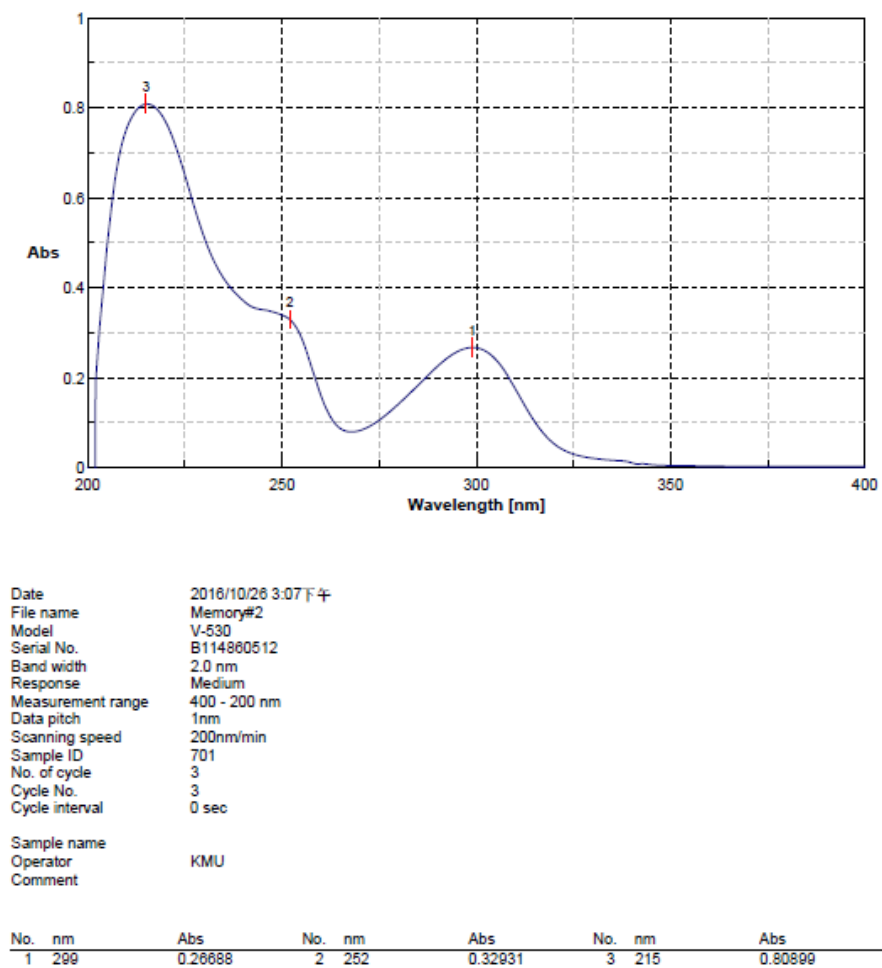

**Figure S6:** COSY Spectrum of racelactone A (**1**) in acetone-*d*<sub>6</sub>.

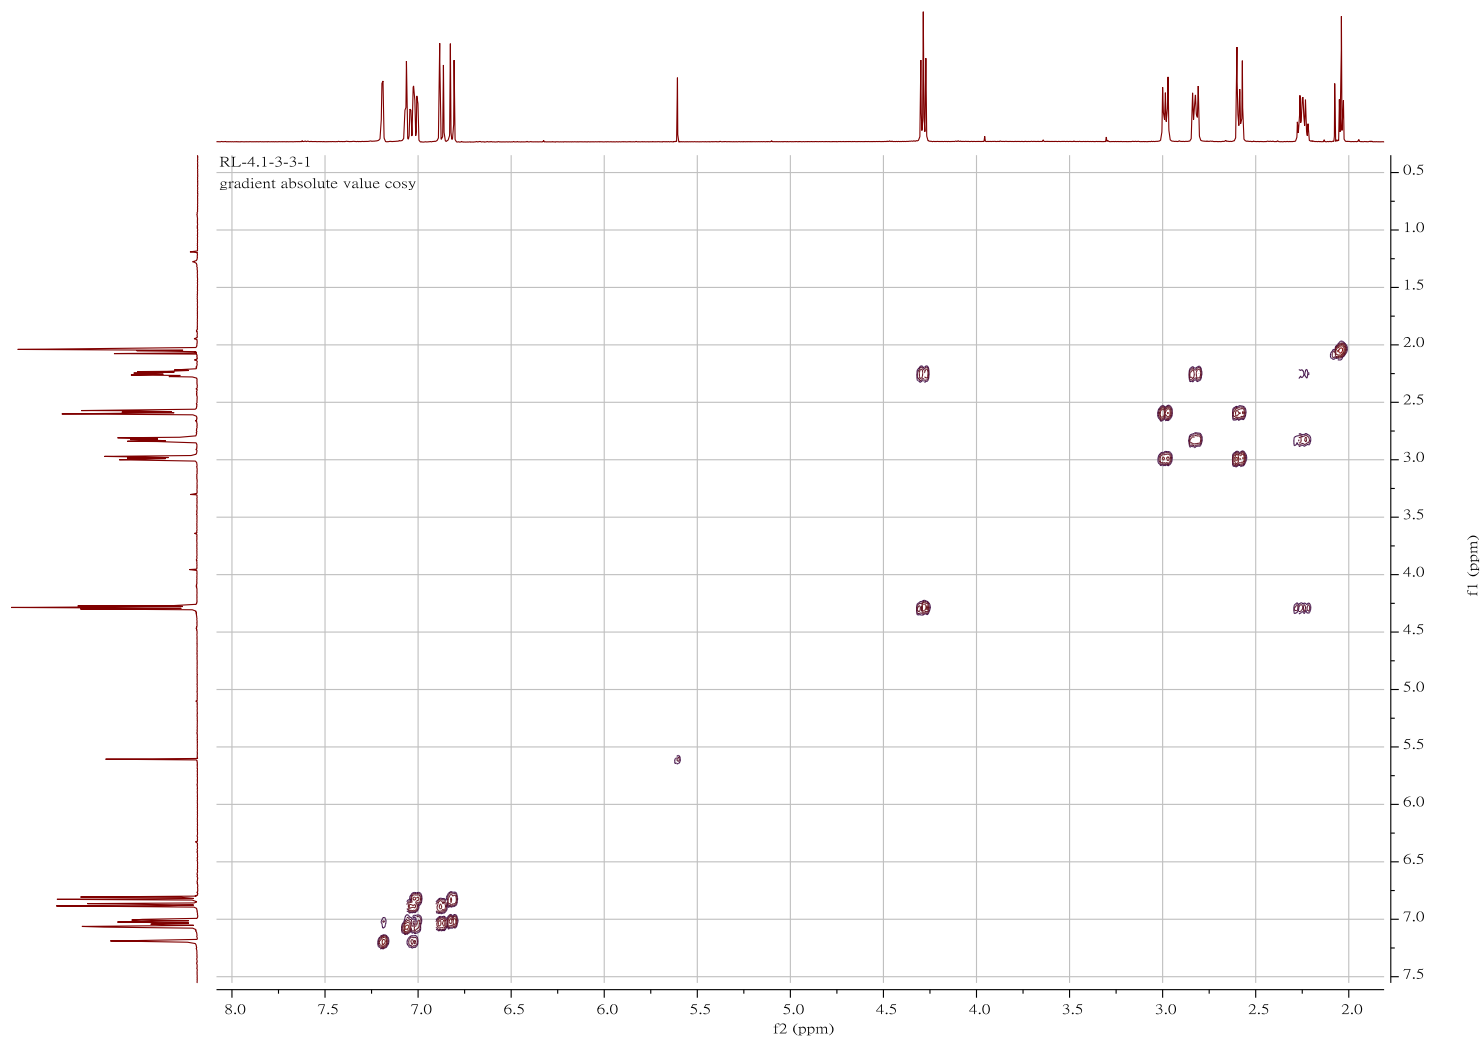

**Figure S7:** HMBC Spectrum of racelactone A (**1**) in acetone- $d_6$ .

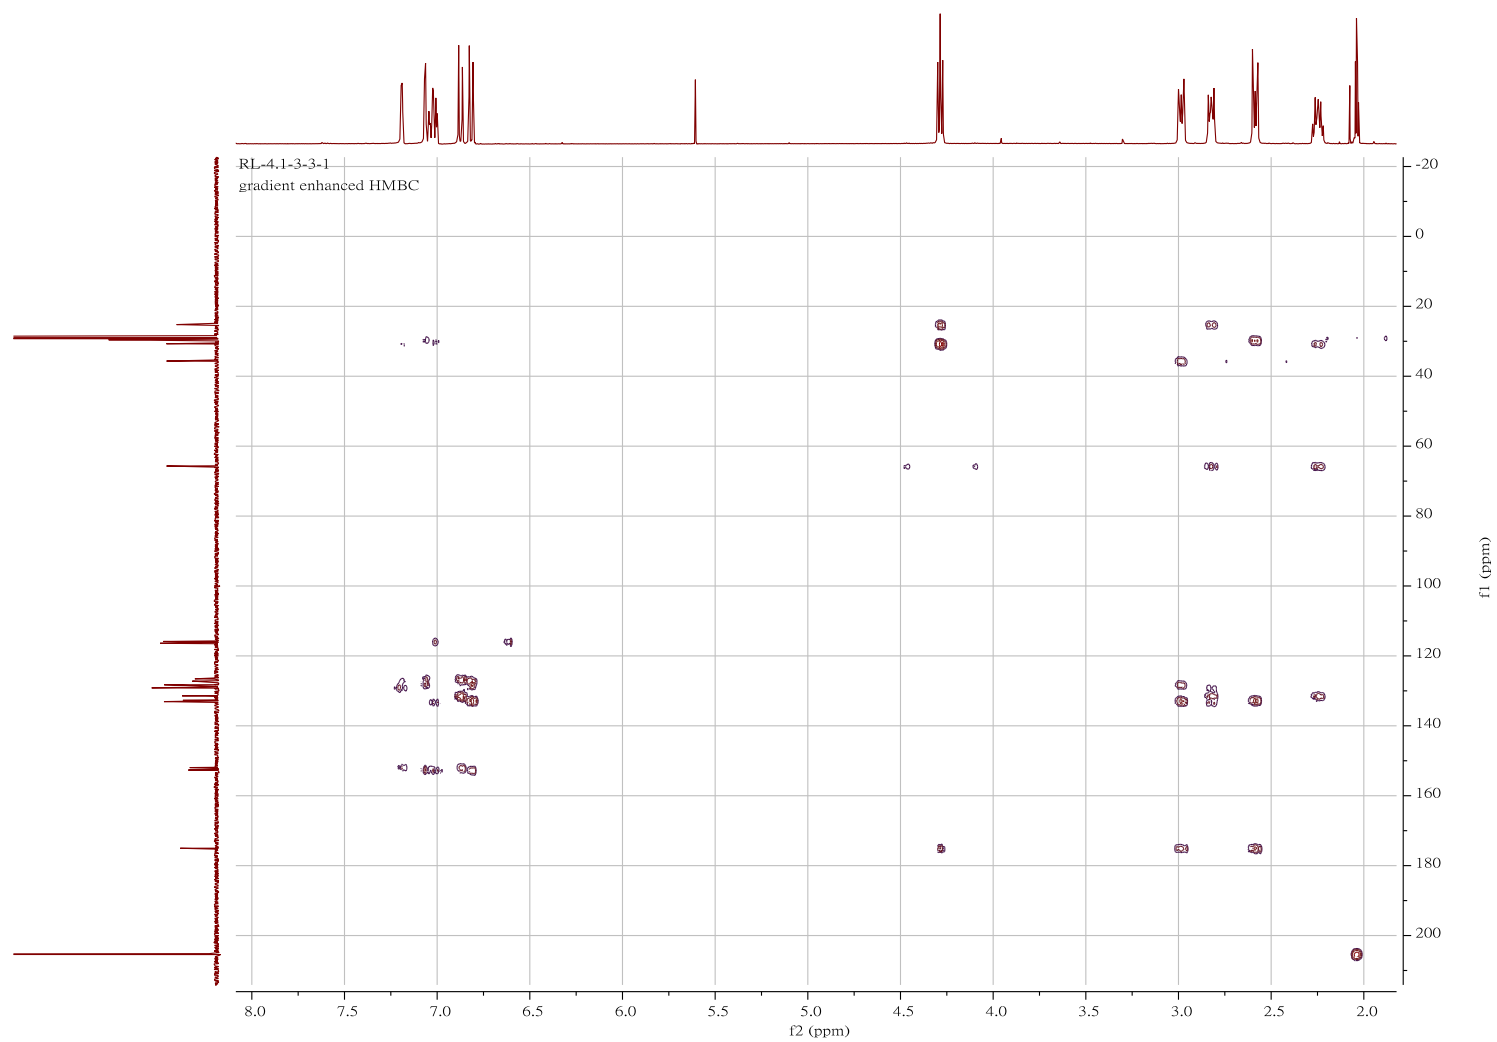

Supplement: Supplementary file 1 [file marinedrugs-16-00404-s001.pdf]
